# Supplementary material for: Correlation between photoluminescence spectra with gas sensing and photocatalytic activities in hierarchical ZnO nanostructures
Source: Royal Society of Chemistry journal article supplement (doi:10.1039/c6ra27737c), 2017-01-01
Supplement: c6ra27737c1.pdf [file c6ra27737c1.pdf]

## Supporting Information

### Correlation between Photoluminescence spectra with Gas Sensing and Photocatalytic Activities in Hierarchical ZnO nanostructures

T. Anh Thu Do,<sup>a\*</sup> Ho Truong Giang<sup>a</sup>, Do Van Huong<sup>a</sup>, Pham Quang Ngan<sup>a</sup>, Giang Hong Thai<sup>a</sup>, Do Thi Thu<sup>a</sup> and Tran Dai Lam<sup>b</sup>

- Institute of Materials Science, Vietnam Academy of Science and Technology, 18 Hoang Quoc Viet, Cau Giay, Hanoi, Vietnam.  
E-mail: thudta@ims.vast.vn;  
Tel.: +84-43-7569318; Fax: +84-43-8360705.
- Graduate University of Science and Technology, Vietnam Academy of Science and Technology, 18 Hoang Quoc Viet, Cau Giay, Hanoi, Vietnam.

#### I. Structures and Morphologies

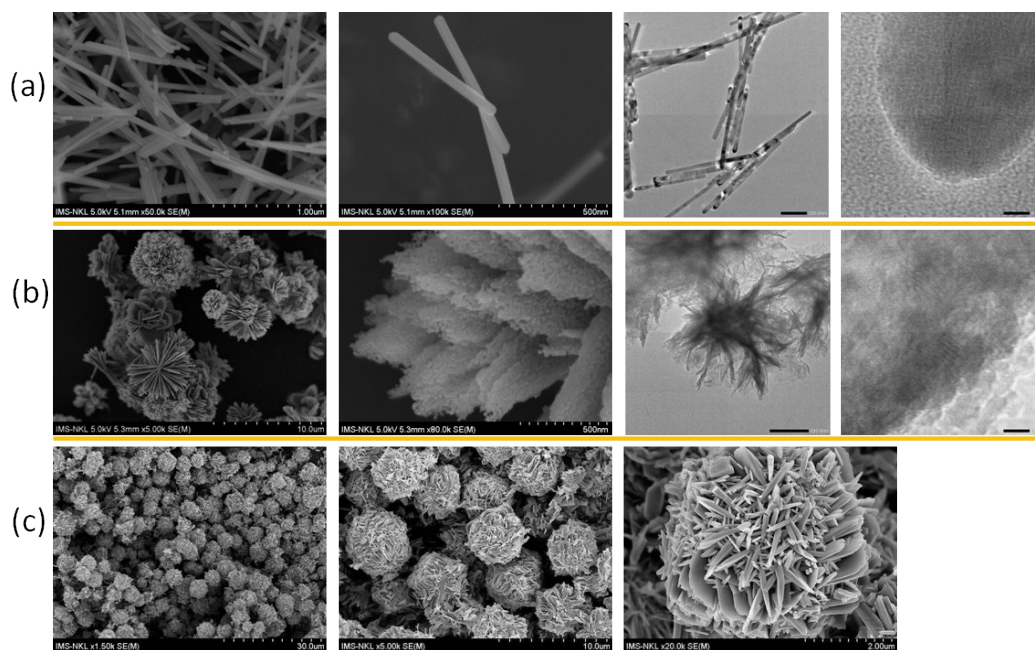

**Supplementary S.1.** FE-SEM and TEM images of hierarchical ZnO structures-based hydrothermal approach (a-c)

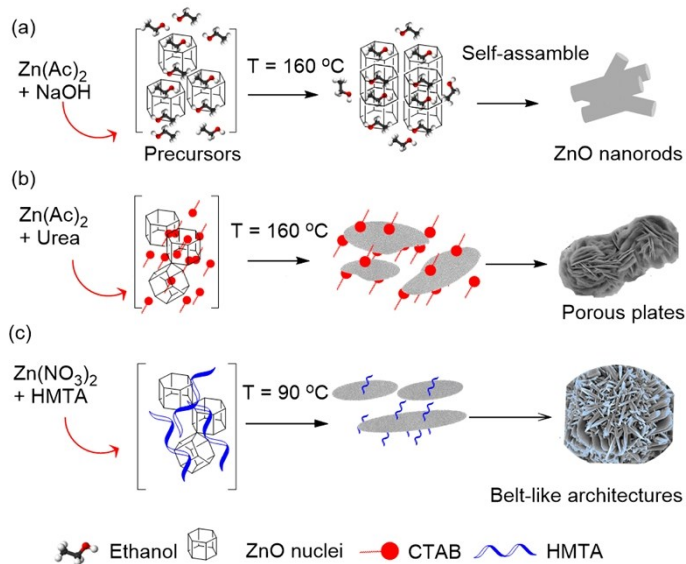

**Supplementary S.2.** Illustration of the growth mechanism of nanorods (a), porous plates (b), and flower-like architectures (c).

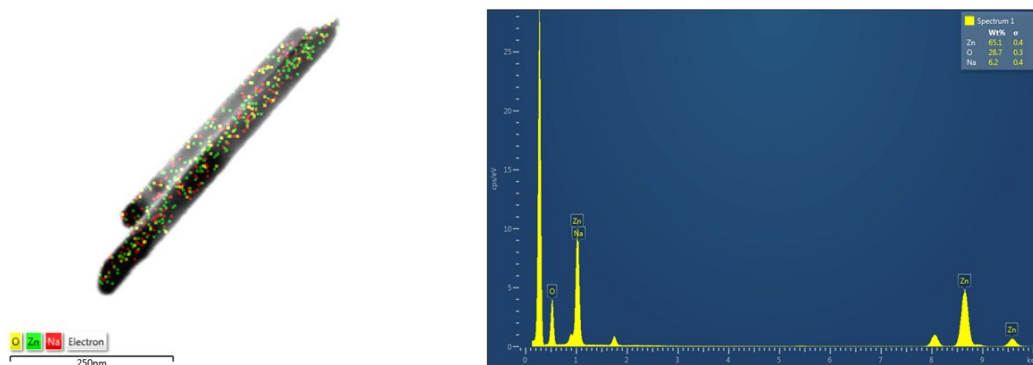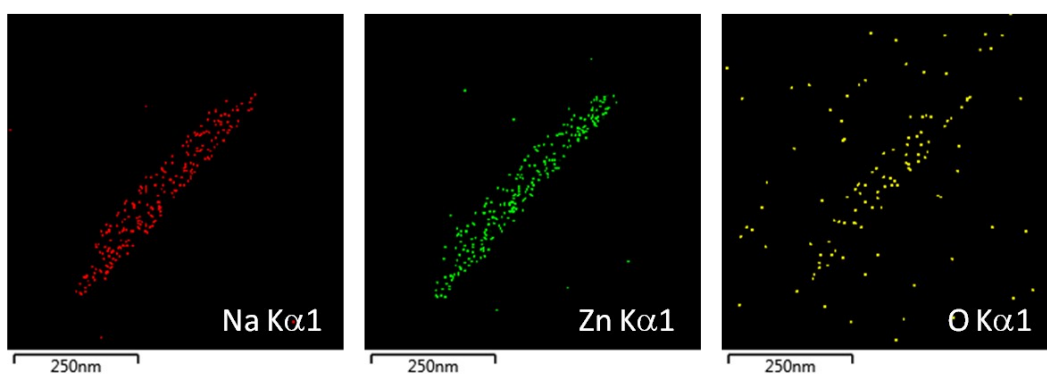

**Supplementary S.3.** STEM-Mapping images of ZnO nanorods

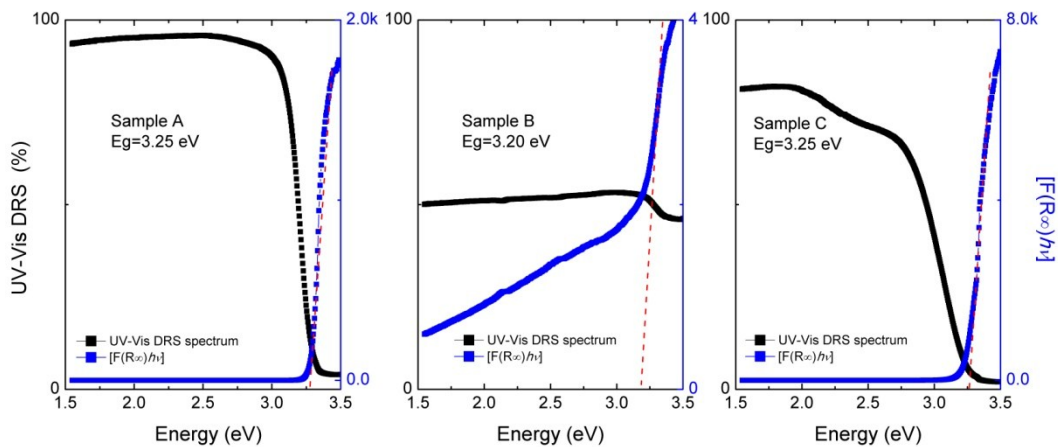

**Supplementary S.4.** UV-Vis diffuse reflectance spectra, and Kubelka-Munk transformed reflectance spectra of the all samples.

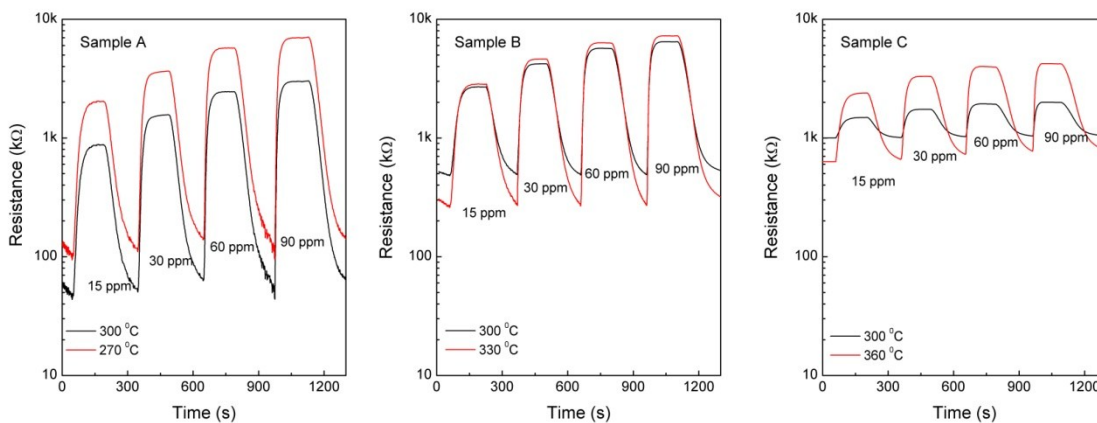

**Supplementary S.5.** Dynamic transient of resistances in response to NO<sub>2</sub> for ZnO architectures at 270 °C and specified operating temperature.

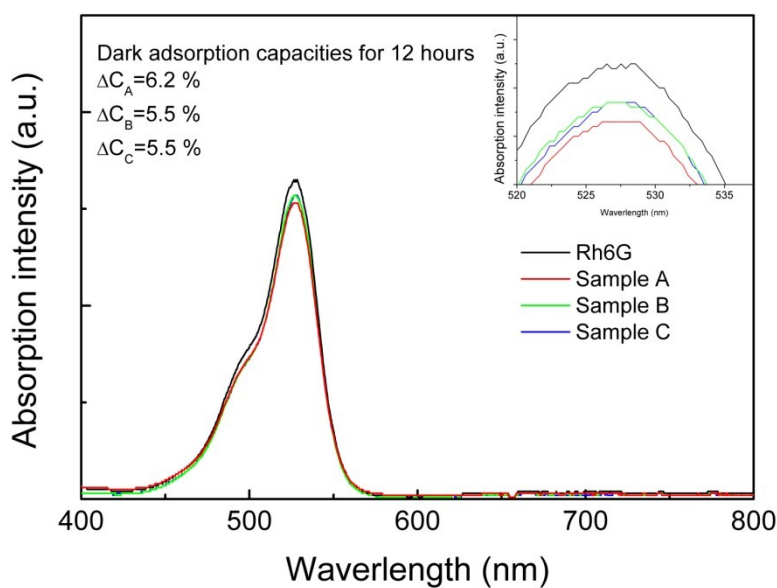

**Supplementary S.6.** UV-vis absorption spectra of all samples are kept in the dark for 12 hours
